# Supplementary material for: Child Cognitive Development and Parent Roles: A Preliminary Comparison of Moroccan Parents to United States and United Kingdom Benchmarks
Source: Springer Nature journal article supplement (doi:10.1007/s10826-023-02542-y), 2023-02-23
Supplement: MOESM1 [file 24056322]

Parenting and Child Development Survey: Oral Consent Form

This survey asks about your ideas about how children develop and about how you are raising your children. It was developed by researchers at the RAND Corporation, a not-for-profit research institute located in California, US. RAND has hired TNS Morocco to help them administer the survey. RAND will keep confidential your identity and will not attribute any of your responses to you. Your participation in this interview is entirely voluntary, and you are free to decline to answer any question. You may also end the session at any time without any consequence for you. As you complete the survey, please answer each question as completely and accurately as you can. Any questions? Please begin.

FOR ONLINE VERSION: I will be right here/next door while you complete the survey. Let me know if you have any problems navigating through the survey, and I will help you with that.
